# Supplementary material for: Different effects of soil bacterial communities affected by biocontrol agent YH-07 on tomato Fusarium wilt inhibition
Source: Royal Society of Chemistry journal article supplement (doi:10.1039/d0ra05452f), 2020-01-01
Supplement: d0ra05452f1.pdf [file d0ra05452f1.pdf]

### Supplementary material

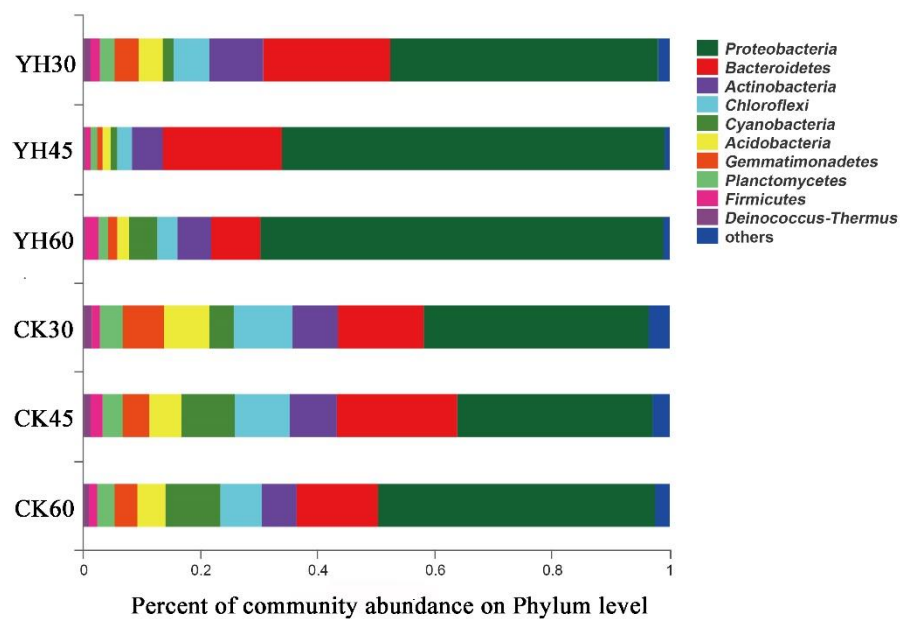

Fig. S1 Bacterial relative abundance of the species at the level of phylum

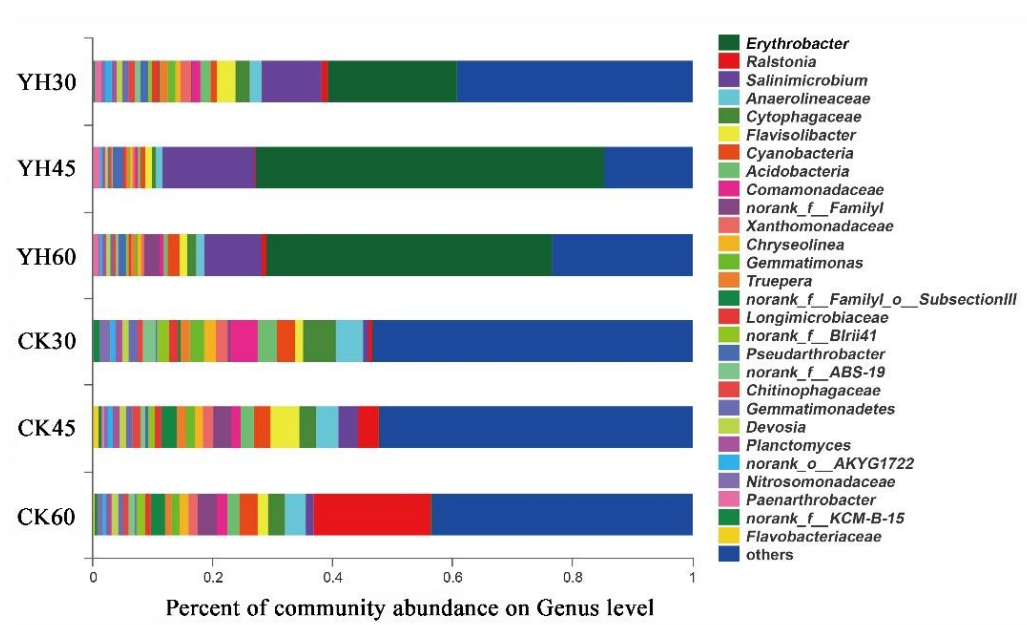

Fig. S2 Bacterial relative abundance of the species at the level of genus

**Table S1 Results of ANOSIM from different treatments**

|              | <i>r</i> | <i>P</i> |
|--------------|----------|----------|
| YH vs CK     | 0.88     | 0.001    |
| YH30 vs CK30 | 0.89     | 0.103    |
| YH45 vs CK45 | 1        | 0.107    |
| YH60 vs CK60 | 1        | 0.093    |
